# Supplementary material for: Prognostic factors and the necessity of chemotherapy for stage II gastric cancer: a model based on multicenter retrospective study
Source: Springer Nature journal article supplement (doi:10.1007/s12672-023-00663-w), 2023-05-08

# ACT

■ No ■ Yes

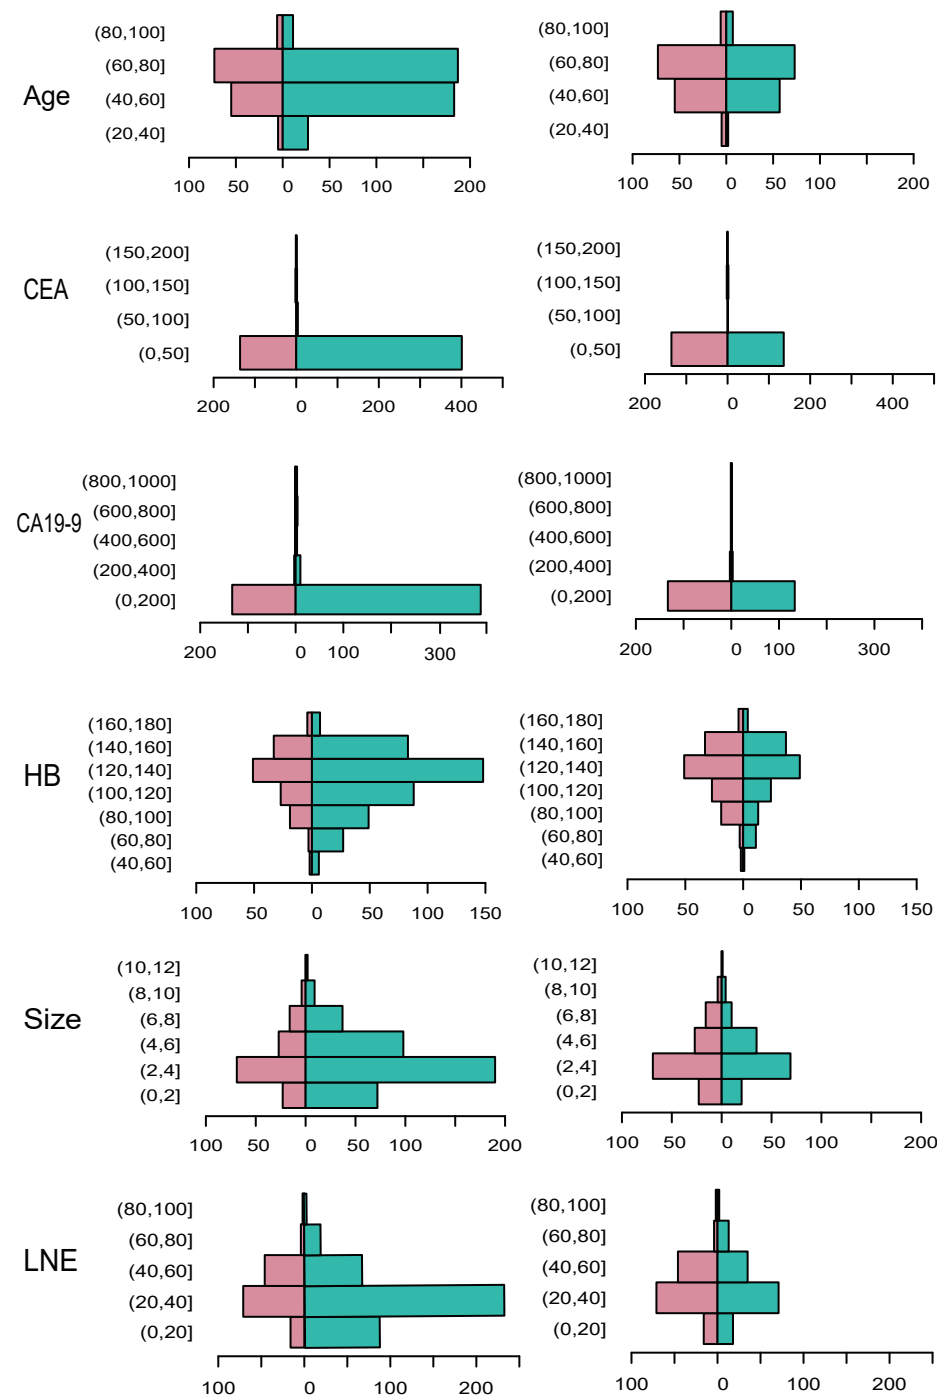

Original

Matched

# Original

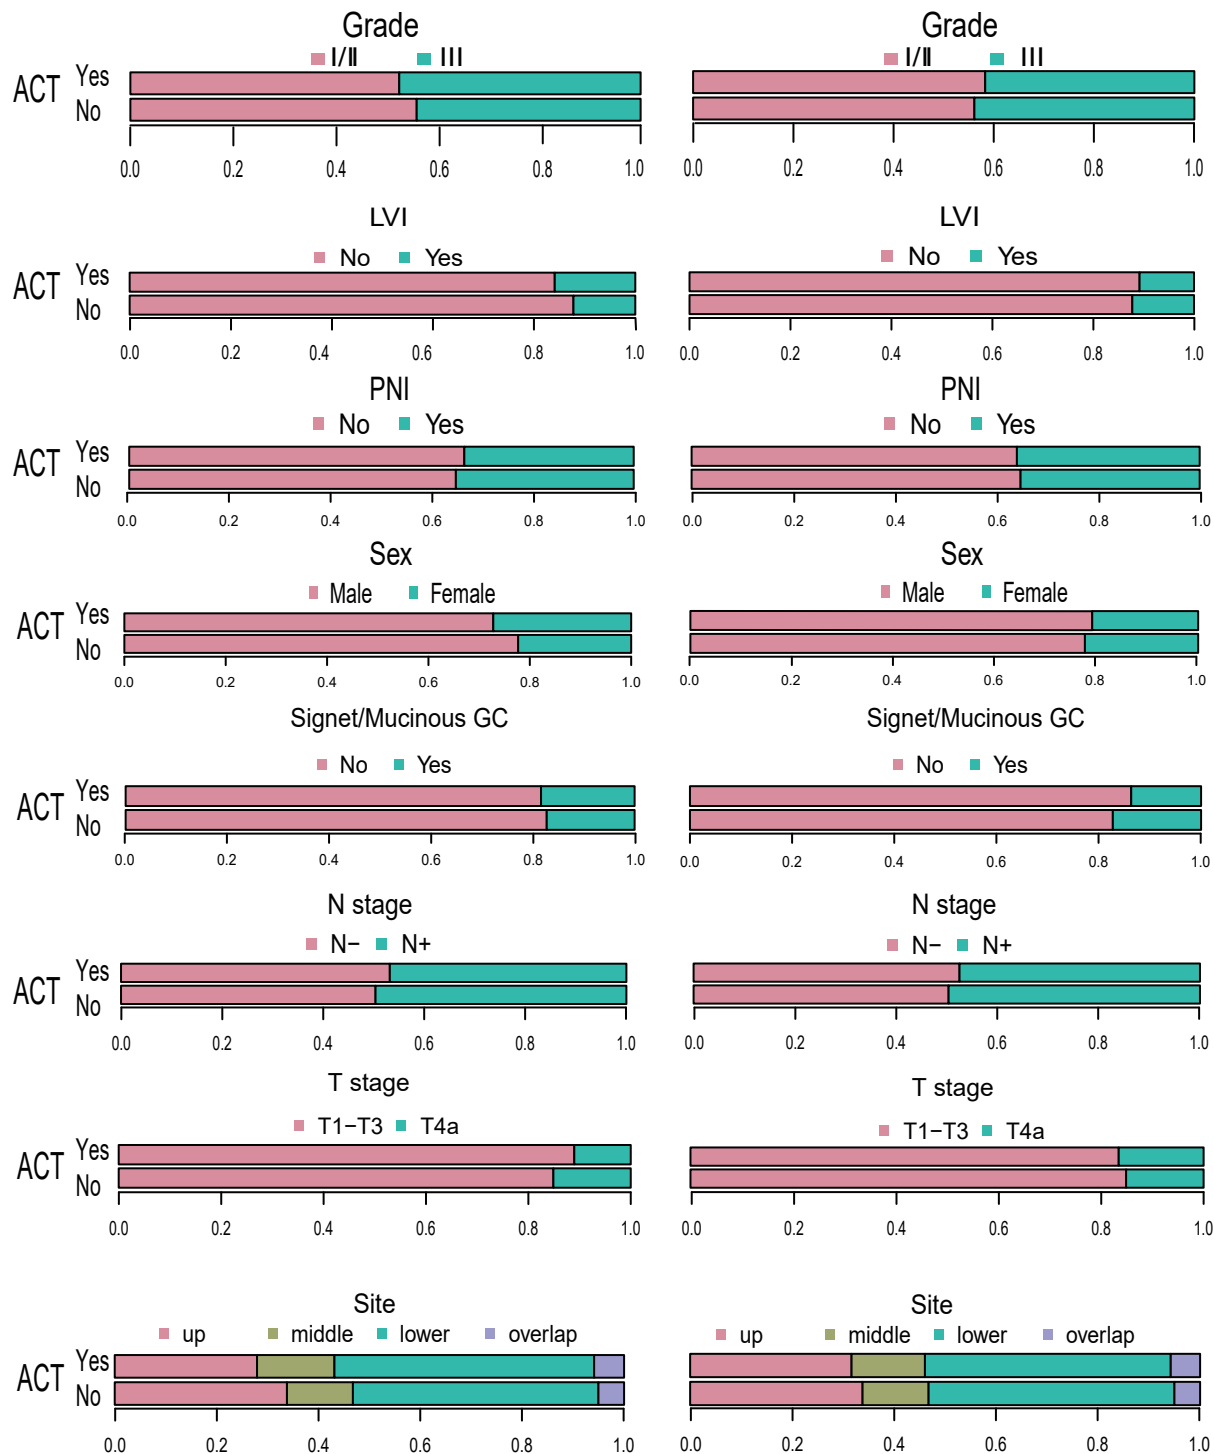

# Matched



Supplement: MOESM1 [file 12672_2023_663_MOESM1_ESM.pdf]
